## Early Development of Hyperparathyroidism Due to Loss of *PTH* Transcriptional Repression in Patients With *HNF1 $\beta$* Mutations?

Silvia Ferrè, Ernie M. H. F. Bongers,\* Ramon Sonneveld,\* Elisabeth A. M. Cornelissen, Johan van der Vlag, Gerben A. J. van Boekel, Jack F. M. Wetzels, Joost G. J. Hoenderop, René J. M. Bindels, and Tom Nijenhuis

Departments of Physiology (S.F., J.G.J.H., R.J.M.B.) and Genetics (E.M.H.F.B.), Nijmegen Centre for Molecular Life Sciences, Radboud University Nijmegen Medical Centre, and Departments of Nephrology (R.S., J.v.d.V., G.A.J.v.B., J.F.M.W., T.N.) and Pediatric Nephrology (E.A.M.C.), Radboud University Nijmegen Medical Centre, 6500 HB Nijmegen, The Netherlands

**Context:** Heterozygous mutations or deletions of the transcription factor hepatocyte nuclear factor 1 $\beta$  (*HNF1 $\beta$* ) result in a heterogeneous syndrome characterized by renal cysts and diabetes, together with a variety of other extrarenal and renal manifestations. Interestingly, in several patients with *HNF1 $\beta$*  abnormalities, we observed early hyperparathyroidism and *PTH* levels that we judged inappropriately high compared with the degree of renal function decline.

**Objective:** Based on the above clinical observations, we tested the hypothesis of a direct role of *HNF1 $\beta$*  in the transcriptional regulation of the human *PTH* gene in the parathyroid gland.

**Design, Setting, and Patients:** Immunostaining of human parathyroid sections, RT-PCR, chromatin immunoprecipitation (ChIP), and luciferase reporter assays in human embryonic kidney cells (HEK293) were performed. We eventually report clinical data from all 11 *HNF1 $\beta$*  patients known at our institute, 9 with heterozygous *HNF1 $\beta$*  whole-gene deletions and 2 with heterozygous *HNF1 $\beta$*  mutations.

**Results:** *PTH* levels were high in 8 patients. In 2 of these patients, the hyperparathyroidism was clearly appropriate for the level of kidney function, whereas *PTH* might be discrepant in the others. We demonstrated *HNF1 $\beta$*  expression in *PTH*-positive cells of human parathyroid gland. Chromatin immunoprecipitation analysis showed that *HNF1 $\beta$*  directly binds responsive elements within the human *PTH* promoter. Cotransfection of a *PTH* promoter-luciferase construct with a wild-type *HNF1 $\beta$*  construct resulted in a maximal reduction of 30% of *PTH* promoter activity. Importantly, *HNF1 $\beta$*  mutants lacked this inhibitory property. Serial deletions in the *PTH* promoter construct revealed that the inhibitory effect of *HNF1 $\beta$*  resides between  $-200$  and  $-70$  bp from the transcription initiation site.

**Conclusions:** Our data demonstrate that *HNF1 $\beta$*  is a novel repressor of human *PTH* gene transcription, which could contribute to the development of hyperparathyroidism in patients with *HNF1 $\beta$*  mutations or deletions. (*J Clin Endocrinol Metab* 98: 4089–4096, 2013)

The parathyroid gland has a central role in calcium (Ca<sup>2+</sup>) and phosphate (PO<sub>4</sub><sup>3-</sup>) homeostasis. PTH regulates the synthesis of 1,25-dihydroxyvitamin D<sub>3</sub> (1,25-D<sub>3</sub>), alters Ca<sup>2+</sup> and PO<sub>4</sub><sup>3-</sup> (re)absorption in the kidney and intestine and modulates bone metabolism (1–3). Serum PTH levels depend on direct secretion of PTH from the secretory granules in the parathyroid gland as well as on synthesis of new PTH molecules secondary to *PTH* gene transcription. PTH expression is restricted to the parathyroid glands in humans and is under the control of specific stimuli and repressors. A low serum Ca<sup>2+</sup> alters the activation of the Ca<sup>2+</sup>-sensing receptor (CaSR) on the surface of parathyroid glands, leads to the rapid release of PTH from the secretory granules, and stimulates *PTH* gene expression, whereas high Ca<sup>2+</sup> inhibits PTH secretion (4). Contrary to Ca<sup>2+</sup>, high PO<sub>4</sub><sup>3-</sup> leads to increased PTH levels. Furthermore, *PTH* transcription is repressed by binding of a complex of 1,25-D<sub>3</sub>, the vitamin D receptor (VDR), and retinoic acid X receptor (RXR) to vitamin D-responsive elements (VDREs) in the promoter region of the *PTH* gene (5, 6). Recently, it was shown that *PTH* gene transcription is also inhibited by fibroblast growth factor (FGF) 23, a novel phosphaturic hormone that acts through the FGF receptor 1 (FGFR1)/klotho receptor complex present in parathyroid cells (7, 8). Finally, the *PTH* promoter activity is regulated by the concerted action of tissue-specific transcription factors, such as glial cells missing B (4), and nonspecific transcription factors, like specificity protein 1, nuclear transcription factor-Y, cyclic AMP-responsive element-binding protein, and transcription factors GATA (9, 10).

The hepatocyte nuclear factor 1 $\beta$  (HNF1 $\beta$ ) is a *Pit-1*, *OCT1/2*, *UNC-86* (POU) domain transcription factor that participates in organogenesis during early embryonic development (11). More specifically, it regulates tubulogenesis in the liver, pancreas, kidney, and genital tract. In the kidney and urinary tract, HNF1 $\beta$  is expressed in renal tubules as well as developing ureters. Heterozygous mutations or deletions in the *HNF1 $\beta$*  gene are responsible for a dominant syndrome characterized by highly heterogeneous renal and extrarenal phenotypes that can comprise: 1) renal malformations with or without cyst formation (glomerulocystic disease, cystic renal dysplasia, calyceal abnormalities, oligomeganephronia, or solitary kidney); 2) liver and genital tract abnormalities; and 3) defects in the exocrine and endocrine pancreatic functions including maturity-onset diabetes of the young type 5 (MODY5; OMIM 137920). Furthermore, HNF1 $\beta$  nephropathy is distinguished by a large variability in renal tubular transport abnormalities (12). Functional HNF1 $\beta$  binding sites have been identified in the promoter regions of many renal cystic genes, (13–15) as well as genes involved in tubular transport (16, 17), such as the

*FXRD2* gene encoding for the  $\gamma$ -subunit of the Na<sup>+</sup>/K<sup>+</sup>-ATPase. The impaired transcription of this gene by HNF1 $\beta$  is suggested to be involved in the renal Mg<sup>2+</sup> wasting observed in almost half of the patients (18).

After observing early hyperparathyroidism and PTH levels that were judged inappropriately high by us in several index patients with known *HNF1 $\beta$*  mutations and/or deletions, we hypothesized that HNF1 $\beta$  might regulate PTH expression in the parathyroid gland. Because HNF1 $\beta$  is a tissue-specific transcription factor highly expressed in the epithelia of specialized endocrine organs and tissues with secondary endocrine functions (19–22), the aim of our study was to investigate whether HNF1 $\beta$  could act as a transcriptional regulator of the human *PTH* gene, possibly by directly affecting *PTH* promoter activity.

## Patients and Methods

### Patients with *HNF1 $\beta$* mutations and/or deletions

All patients were diagnosed by nephrologists and/or clinical geneticists at the Radboud University Nijmegen Medical Centre, The Netherlands. Clinical histories were collected from hospital records. Informed consent for genetic analyses was obtained from all patients. Intact PTH was measured on an Architect random access analyzer (Abbott). In a limited number of samples, intact PTH was measured by another method that gave comparable results and conform to the evaluation protocol 9 (EP9, Clinical and Laboratory Standards Institute) protocol.

### DNA constructs

The 5'-promoter region of the human *PTH* gene (–1476/+25; +1 designates the transcription start site, NM\_000315.2) was obtained by amplification of genomic DNA using a high-fidelity DNA polymerase (Phusion, Finnzymes; forward 5'-AAAAAAGGTACCCAGCTATAAAGTCATCCCGTCTT-3' and reverse 5'-GGGGGGGAGCT CGCAGACCCCTTAATGGTGA-3'). To generate a firefly luciferase reporter construct, the PCR product was cloned into a pGL3-Basic vector (Promega), using the restriction sites *KpnI* and *SacI*. Firefly luciferase constructs for deletion analysis were prepared with a similar cloning strategy after amplification of the promoter regions –1000/+25 (forward 5'-AAAAAAGGTACCCAGTCAGACATGTGGCAGCATCATG-3' and reverse 5'-GGGGGGGAGCTCGCAGACCCCTTAAATGGTGA-3'), –630/+25 (forward 5'-AAAAAAGGTA CCCATGCAGTTAGTGCTTATCAAATG-3' and reverse 5'-GGGGGGGAGCTCGCAGACCCCTTAAATGGTGA-3'), –500/+25 (forward 5'-AAAAAAGGTACCCAAATTATTCTTAA CACTTCCTTTAAG-3' and reverse 5'-GGGGGGGAGCTCGCAGACCCCTTAAATGGTGA-3'), –200/+25 (forward 5'-AAAAAAGGTACCGTCTTTGCATAAGCCCCTTGTC-3' and reverse 5'-GGGGGGGAGCTCGCAGACCCCTTAAATGGTGA-3'), and –70/+25 (forward 5'-AAAAAAG GTACCCAGAGAAT-TGGGAGTGACATC-3' and reverse 5'-GGGGGGGAGCTCGCAGACCCCTTAAATGGTGA-3'). The pRL-CMV vector encoding Renilla luciferase was commercially available (Promega) and used to correct for transfection efficiency. HA-HNF1 $\beta$  wild-

type and HA-HNF1 $\beta$  p.His69fsdelAC, p.Lys156Glu, p.His324Ser325fsdelCA, and p.Tyr352fsinsA. pCINEO IRES GFP were cloned as previously described (23). All constructs were verified by sequence analysis.

### Cell culture and transfection

Human embryonic kidney cells (HEK293) were grown in DMEM (Bio Whittaker-Europe) containing 10% (vol/vol) FBS (Thermo Fisher HyClone), 2mM L-glutamine, and 10  $\mu$ g/mL ciproxin at 37°C in a humidity-controlled incubator with 5% (vol/vol) CO<sub>2</sub>. The cells were transiently transfected with the respective constructs using polyethylenimine cationic polymer (PEI, Polysciences Inc) and assayed 48 hours after transfection. When performing dose-response analysis, an empty vector (including nonsense mock DNA) was used to keep the total amount of transfected DNA constant.

### Luciferase reporter assay

In a 12-well plate, 700 ng of the *PTH* promoter-luciferase constructs and 100 ng of either empty vector (mock DNA) or HA-HNF1 $\beta$  wild-type, HA-HNF1 $\beta$  p.His69fsdelAC, p.Lys156Glu, p.His324Ser325fsdelCA, and p.Tyr352fsinsA. pCINEO IRES GFP constructs were cotransfected into HEK293 cells. To correct for transfection efficiency, 10 ng of pRL-CMV was used as a reference. Firefly and renilla luciferase activities were measured with the dual-luciferase reporter assay (Promega).

### Immunohistochemistry

Staining was performed on 6- $\mu$ m sections of frozen human cadaveric parathyroid samples that were fixed with 100% methanol for 10 minutes at -20°C. Subsequently, sections were washed 3 times with buffer (0.15 mol/L NaCl, 0.1 mol/L Tris adjusted to pH 7.6 with HCl) before incubation in blocking buffer for 30 minutes. Sections were stained overnight at 4°C with a rabbit antihuman HNF1 $\beta$  (1:20, sc-22840; Santa Cruz Biotechnology). The next day, sections were washed and incubated with a goat antirabbit secondary antibody coupled to Alexa Fluor 488 (1:300, A11008; Invitrogen) for 1 hour at room temperature. Sections were washed and incubated for 2 hours with a mouse antihuman PTH antibody (1:50, 7170-6216; AbD Serotec). After washing, a goat antimouse secondary antibody conjugated to Alexa Fluor 594 (1:300, A11005; Invitrogen) was applied for 1 hour. Subsequently, sections were washed, incubated for 30 minutes with 4',6-diamidino-2-phenylindole (DAPI), and mounted with Mowiol. Photographs were taken using a Zeiss Axio Imager 1 microscope equipped with a HXP120 Kubler Codix fluorescence lamp and a Zeiss AxioCam MRm digital camera.

### RT-PCR analysis

Total RNA from human parathyroid glands was isolated using Trizol (Ambion, Life Technologies). Total RNA (1.5  $\mu$ g) was

reverse transcribed and end-point PCR performed. Part of the RNA sample was not reverse transcribed before PCR and thereby served as a negative control. Sequences of the oligonucleotides used for the RT-PCR are shown in Table 1 and Supplemental Table 1 (published on The Endocrine Society's Journals Online website at <http://jcem.endojournals.org>).

### Chromatin immunoprecipitation

Chromatin immunoprecipitation (ChIP) analysis was performed using HEK293 cells cotransfected with 700 ng of the human *PTH* promoter luciferase constructs -1476/+25 or -70/+25 and 100 ng of the HNF1 $\beta$  pCINEO IRES GFP construct. Cells were harvested 48 hours after transfection, and a Magna ChIP A assay was performed according to the manufacturer's protocol (Merck Millipore). In short, cells were treated with formaldehyde to cross-link the chromatin. After cell lysis, samples were sonicated twice for 30 seconds on wet ice using a 22- $\mu$ m amplitude with a Soniprep 150 (Measuring and Scientific Equipment). Samples were incubated with 5.0  $\mu$ g rabbit polyclonal antihuman HNF1 $\beta$  antibody (Santa Cruz; sc-22840), rabbit IgG isotype antibodies as negative control, or anti-trimethyl-histone H3 antibodies as positive control, which were bound to protein A magnetic beads. Subsequently, chromatin complexes were eluted, the cross-links were reversed, and the DNA was isolated. The presence of *PTH* promoter DNA was evaluated using real-time PCR targeting the human *PTH* promoter (5'-GCCTGGAGCAACACTCTAAG-3' and 5'-CATCCTGGCTTCATGTCATCC-3'). Subsequently, samples were loaded on a 2% agarose gel and visualized using ProXima C16 software version 3.0 (Isogen Life Science).

### Data analysis

Results are based on a minimum of 3 independent experiments, with each condition performed in triplicate, unless otherwise stated. Values are expressed as means  $\pm$  SEM. Statistical significance ( $P < .05$ ) was determined using unpaired Student's *t* tests.

## Results

### PTH levels in a cohort of HNF1 $\beta$ patients

We initially reviewed the cases of several HNF1 $\beta$  patients, which raised the hypothesis of a link between *HNF1 $\beta$*  mutations or whole-gene deletions and early hyperparathyroidism. One patient underwent parathyroidectomy at the age of 23 years for primary hyperparathyroidism (patient VII, Table 2). This patient was 36 years of age before any connection between *HNF1 $\beta$*  mutations and his clinical symptoms was revealed, at which time he again dis-

**Table 1.** Oligonucleotide Sequences Used for RT-PCR Analysis

| Gene                           | Accession   | Forward (5'-3')           | Reverse (5'-3')            | Amplicon Size, bp |
|--------------------------------|-------------|---------------------------|----------------------------|-------------------|
| <i>hPTH</i>                    | NM_000315.2 | CATTGTATGTGAAGATGATACCTGC | GCAGCATGTATTGTTGCCCT       | 424               |
| <i>hHNF1<math>\beta</math></i> | NM_000458.2 | CATACCTCACCAACGGCCA       | AAACAGCAGCTGATCCTGACT      | 426               |
| <i>hGAPDH</i>                  | NM_002046.4 | GGAGTCAACGGATTTGGTCGTA    | GGCAACAATATCCACTTTACCAGAGT | 78                |

**Table 2.** Laboratory Investigations of 11 Patients With HNF1 $\beta$  Abnormalities<sup>a</sup>

| Patient | Gender | Age, y | PTH, pmol/L | Ca <sup>2+</sup> , mmol/L | PO <sub>4</sub> <sup>3-</sup> , mmol/L | Mg <sup>2+</sup> , mmol/L | Cr, $\mu$ mol/L | C <sub>Cr</sub> , mL/min | eGFR, mL/min/1.73 m <sup>2</sup> | Urinary Ca <sup>2+</sup> /Cr, mmol/mmol | TRP, % | Abnormality | Additional Information                              |
|---------|--------|--------|-------------|---------------------------|----------------------------------------|---------------------------|-----------------|--------------------------|----------------------------------|-----------------------------------------|--------|-------------|-----------------------------------------------------|
| I.1     | M      | 51     | 13.9        | 2.26                      | 0.80                                   | 0.55                      | 114             |                          | 62                               | <0.1                                    | 71     | Deletion    |                                                     |
| I.2     | F      | 47     | 14.7        | 2.31                      | 0.79                                   | 0.54                      | 141             |                          | 35                               | <0.01                                   | 82     | Deletion    |                                                     |
| I.3     | F      | 42     | 8.8         | 2.38                      | 0.98                                   | 0.54                      | 121             | 83                       |                                  | 0.18                                    | 81     | Deletion    |                                                     |
| I.4     | F      | 15     | 9.2         | 2.38                      | 1.27                                   | 0.41                      | 65              | 109                      |                                  | <0.01                                   | 88     | Deletion    |                                                     |
| I.5     | M      | 14     | 6.6         | 2.52                      | 1.01                                   | 0.51                      | 64              |                          | >90                              | ND                                      | ND     | Deletion    |                                                     |
| II      | M      | 7      | ND          | 2.52                      | 1.40                                   | 0.65                      | 41              |                          | >90                              | 0.23                                    | 91     | Deletion    |                                                     |
| III     | M      | 10     | 5.2         | 2.45                      | 1.31                                   | 0.70                      | 37              |                          | >90                              | 0.96                                    | 94     | Deletion    |                                                     |
| IV      | F      | 42     | 5.3         | 2.39                      | 1.35                                   | 0.43                      | 107             | 48                       |                                  | <0.1                                    | 87     | Deletion    |                                                     |
| V       | F      | 39     | 9.5         | 2.34                      | 0.88                                   | 0.79                      | 93              | 87                       |                                  | <0.1                                    | ND     | Deletion    | c.883C→T p.Arg295Cys                                |
| VI      | F      | 1      | 23.1        | 2.52                      | 1.53                                   | 1.21                      | 331             | ESRD                     |                                  | ND                                      | ND     | Deletion    | c.18delG p.Ser7Argfs*7                              |
|         |        | 9      | 13.4        | 2.57                      | 1.36                                   | 0.77                      | 79              | 69                       |                                  | 0.29                                    | 86     | Deletion    | c.18delG p.Ser7Argfs*7                              |
| VII     | M      | 23     | ND          | 2.96                      | 0.52                                   | 0.47                      | 128             |                          | 64                               | ND                                      | ND     | Deletion    | Parathyroidectomy for hyperparathyroidism at age 23 |
|         |        | 36     | 16.4        | 2.30                      | 0.79                                   | 0.64                      | 150             | 74                       |                                  | <0.06                                   | 86     | Deletion    | Data at eventual diagnosis                          |

Abbreviations: C<sub>Cr</sub>, creatinine clearance; Cr, creatinine; eGFR, estimated GFR; ESRD, end-stage renal disease; F, female; M, male; ND, not determined; TRP, renal tubular reabsorption of phosphate.

<sup>a</sup> Normal levels are as follows: PTH, 1.0–6.5 pmol/L; serum Ca<sup>2+</sup>, 2.20–2.65 mmol/L; serum PO<sub>4</sub><sup>3-</sup>, for age <12 years, 1.3–1.9 mmol/L, and for age >12 years, 0.8–1.4 mmol/L; serum Mg<sup>2+</sup>, 0.7–1.1 mmol/L; serum Cr, 45–110  $\mu$ mol/L; C<sub>Cr</sub>, 89–143 mL/min; Ca<sup>2+</sup>/Cr ratio, 0.40–0.57 mmol/mmol; TRP, >85%. eGFR was calculated by Modification of Diet in Renal Disease formula (adults) or Cockcroft-Gould (children).

played hyperparathyroidism. Three patients from one family (patients I.3, I.4, and I.5), showed increased PTH levels without clearly reduced renal function based on creatinine clearance or estimated glomerular filtration rate (GFR).

Including the patients just described, we retrospectively reviewed 11 patients, 5 familial and 6 sporadic cases, with known HNF1 $\beta$  mutations or whole-gene deletions visiting the outpatient clinic of our institution (Table 2). Nine patients had an HNF1 $\beta$  whole-gene deletion, 1 patient had a frameshift mutation (c.18delG, p.Ser7Argfs\*7), and 1 patient had a missense mutation (c.883C→T, p.Arg295Cys).

Serum intact PTH levels were available for 10 of 11 patients. Eight of these 10 patients had hyperparathyroidism (6.6–16.4 pmol/L, normal range 1.0–6.5 pmol/L). Eight patients had hypomagnesemia (0.41–0.65 mmol/L), whereas their plasma PO<sub>4</sub><sup>3-</sup> and Ca<sup>2+</sup> levels were within the normal range. Five of 7 patients with increased PTH levels belong to the same family (patients I.1–I.5) and showed concomitant hypomagnesemia. No hypomagnesemia was observed in a patient with a c.883C→T (p.Arg295Cys) HNF1 $\beta$  mutation and high PTH levels (patient V, Table 2). In 2 patients, the hyperparathyroidism was initially clearly appropriate for the level of kidney function (patient I.2 and VI, Table 2). After renal transplantation, the former patient with a c.18delG (p.Ser7Argfs\*7) HNF1 $\beta$  mutation showed improved renal function and normal plasma Mg<sup>2+</sup> levels, whereas the PTH levels remained increased. Urinary calcium to creatinine ratio revealed that 9 of 10 patients whose data were available displayed hypocalciuria. Tubular reabsorption of phosphate was at or below the lower limit of normal in all patients suggested to display hyperparathyroidism. Overall, to us, these data appeared in line with the hypothesized link be-

tween HNF1 $\beta$  mutations or whole-gene deletions and hyperparathyroidism, distinct from secondary hyperparathyroidism due to renal function decline. Therefore, we proceeded to evaluate the hypothesis that HNF1 $\beta$  could act as a transcriptional regulator of the PTH gene.

### HNF1 $\beta$ is expressed in parathyroid cells

First, we investigated HNF1 $\beta$  expression in human parathyroid gland tissue. HNF1 $\beta$  mRNA expression in human parathyroid glands was detected by end-point PCR and compared with HNF1 $\beta$  mRNA expression in a control human kidney sample (Figure 1A). The specificity of the tissue was confirmed by amplification of the PTH transcript, which was clearly present in parathyroid tissue but, as expected, not in the kidney. The histology of parathyroid glands is easily recognizable by the densely packed cells. PTH was highly expressed in the cytosol of the parathyroid cells (Figure 1B). Importantly, HNF1 $\beta$  was localized in PTH-positive cells in a nuclear pattern, as shown by the colocalization with the nuclear marker DAPI that binds to double-stranded DNA (Figure 1B).

### Wild-type HNF1 $\beta$ binds the human PTH gene promoter and inhibits its activity

HNF1 $\beta$  affects transcription of target genes through binding of the POU domains to a DNA consensus sequence, reported in Figure 2A. Using the Consite program (asp.ii.uib.no:8090/cgi-bin/CONSITe/consite), prediction analysis for HNF1 binding sites in the –1476 bp region upstream of the transcription initiation site of the human PTH promoter identified 2 relatively well-conserved sites, at –1238 and –690 (Figure 2B). Demay et al

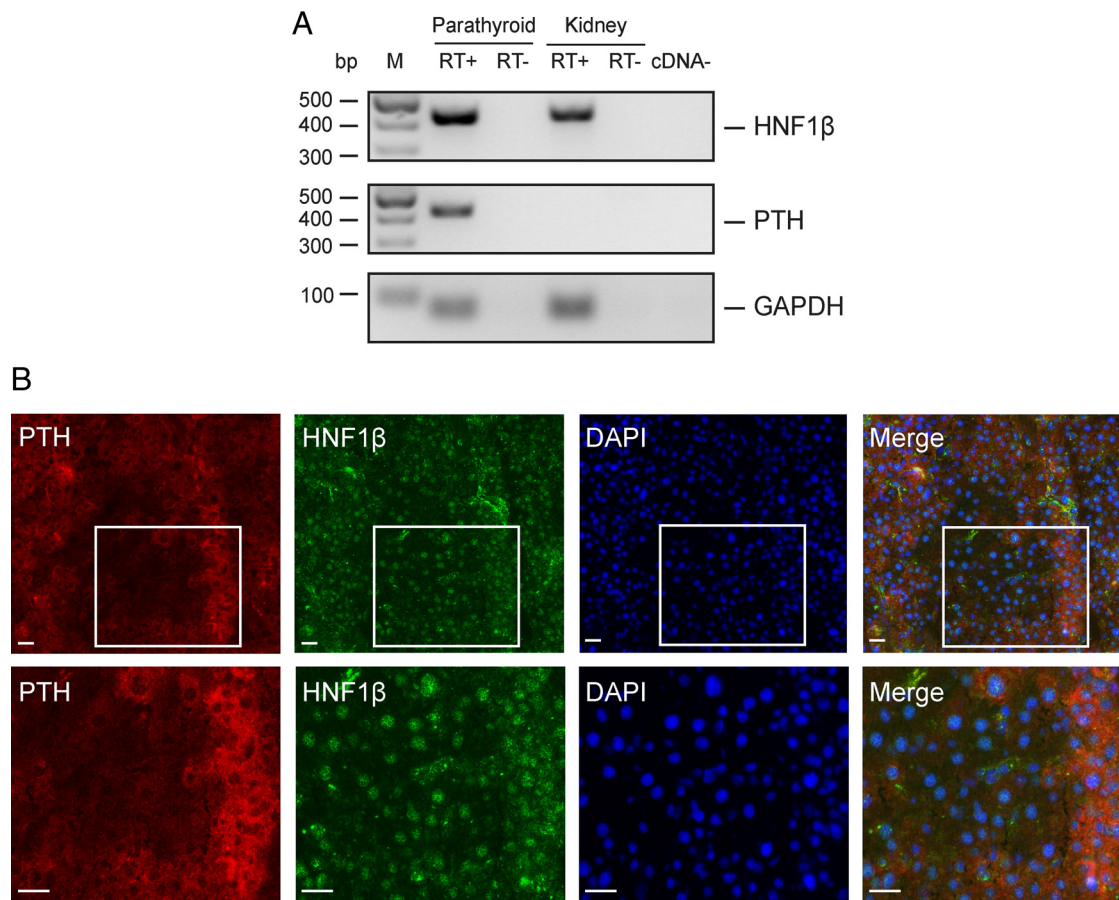

**Figure 1.** HNF1 $\beta$  expression in human parathyroid glands. A, Endogenous expression of HNF1 $\beta$  in human parathyroid tissue was investigated using RT-PCR. PTH was included as positive control for tissue specificity and glyceraldehyde-3-phosphate dehydrogenase (GAPDH) as housekeeping gene. RT+ indicates RT sample; RT- indicates no RT control; cDNA- indicates no cDNA control. B, Representative images of immunohistochemical analysis of HNF1 $\beta$  and PTH colocalization in human parathyroid tissue. DAPI is a nuclear marker. Scale bars, 20  $\mu$ m.

(24) have previously suggested the presence of a poorly conserved consensus sequence of a POU transcription factor around position  $-101$ . To determine whether the *PTH* promoter is bound by HNF1 $\beta$ , we performed a ChIP assay using a human *PTH*  $-1476$  promoter construct transfected in HEK293 cells, which do not endogenously express HNF1 $\beta$  (25). The immunoprecipitated genomic fragment bound by exogenously expressed HNF1 $\beta$  was quantified by real-time PCR analysis, which showed a 9-fold enrichment of the *PTH* promoter when precipitated with the anti-HNF1 $\beta$  antibody (Figure 2C) compared with the rabbit IgG isotype control (Figure 2C). Using a human *PTH*  $-70$  promoter construct, no significant difference was seen between both antibodies. Immunoprecipitation with an anti-trimethyl-histone H3 antibody was performed as positive control. Two percent of the chromatin used for immunoprecipitation (input) was also included in the analysis (Figure 2C). To study the involvement of HNF1 $\beta$  in the transcriptional regulation of the human *PTH* gene, luciferase-reporter assays were performed. When wild-type HNF1 $\beta$  was transiently cotransfected with the human *PTH*  $-1476$

promoter construct, a dose-dependent reduction of the promoter activity was observed, up to a 30% decrease compared with cells transfected with the mock plasmid (Figure 2D). This inhibitory effect was not demonstrated for the p.His69fsdelAC, p.Lys156Glu, p.His324Ser325fsdelCA, and p.Tyr352fsinsA mutants. When the latter were coexpressed with the *PTH* reporter construct, the promoter activity was comparable or higher to what was observed in mock plasmid-expressing cells (Figure 3A). To pinpoint the HNF1 $\beta$ -responsive region within the *PTH* promoter, serial deletions of the reporter construct were prepared (Figure 3B). HNF1 $\beta$  p.His324Ser325fsdelCA lacks a complete functional transactivation domain and does not down-regulate *PTH* promoter activity. For the wild-type HNF1 $\beta$ , inhibition of *PTH* promoter activity persisted until  $-200$  bp from the transcription initiation site. A further deletion to  $-70$  bp no longer showed a significant difference between wild-type and mutant HNF1 $\beta$  (Figure 3E). These data demonstrate that 1 or more HNF1 $\beta$ -responsive elements reside in this proximal promoter region of the human *PTH* gene.

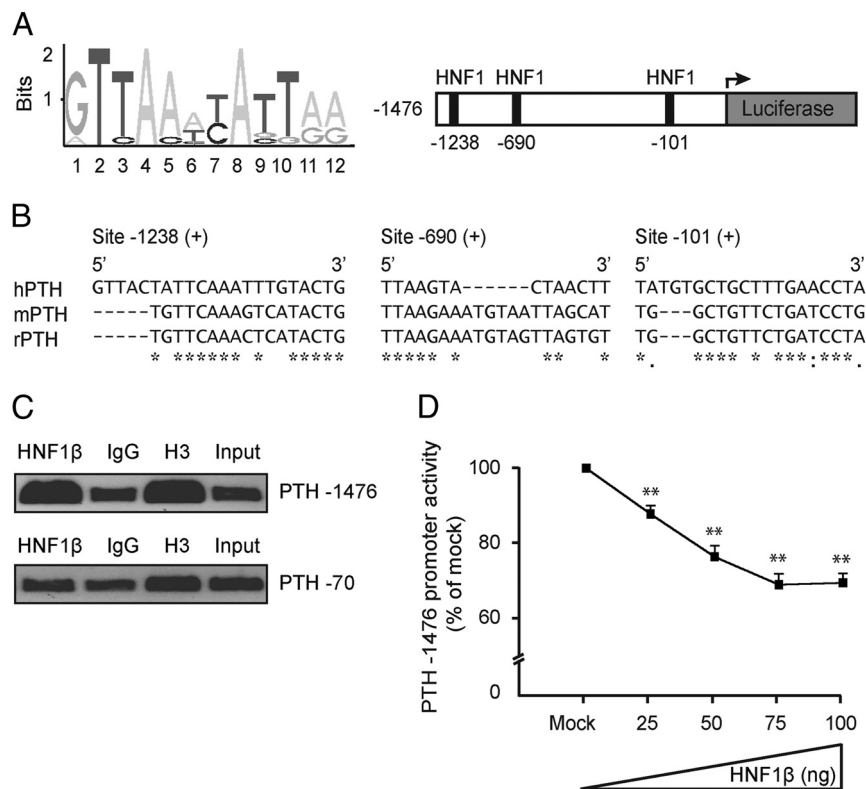

**Figure 2.** The human *PTH* gene as target of the HNF1 $\beta$  transcription factor. A, Sequence logo of the HNF1 $\beta$  motif from the Jaspas database (ID MA0153.1). In the human *PTH* promoter region (–1476 bp from the transcription initiation site), 3 putative HNF1 binding sites map at –1238, –690, and –101 of the forward DNA strand (+). B, Sequence alignment of the 3 putative HNF1 recognition sites in the *PTH* promoter region of different mammalian species. C, Binding of the *PTH* promoter by HNF1 $\beta$  was verified by a ChIP assay in HEK293 cells cotransfected with the human *PTH* promoter luciferase constructs, –1476/+25 or –70/+25, and wild-type HNF1 $\beta$ . For immunoprecipitation, an anti-HNF1 $\beta$  antibody or a rabbit IgG isotype control antiserum was used. Immunoprecipitation with an anti-trimethyl-histone H3 antibody was included as positive control. Two percent of the chromatin used for immunoprecipitation (input) was also included as a control. D, Dose-response curve of increasing amounts of wild-type HNF1 $\beta$  cotransfected in HEK293 cells with a luciferase construct carrying the human *PTH* gene promoter region –1476/+25 (n = 9). \*\*, P < .001, compared with mock.

## Discussion

In the present study, we demonstrated that the nuclear transcription factor HNF1 $\beta$  is expressed in the parathyroid gland and acts as a repressor of human *PTH* gene expression. ChIP experiments and luciferase-assays in HEK293 cells showed that HNF1 $\beta$  binds and inhibits the *PTH* promoter via *cis*-elements located in the proximal promoter of the *PTH* gene. This inhibition is lost when HNF1 $\beta$  is mutated or absent. Although further experiments are needed to determine which molecular pathways govern HNF1 $\beta$  activity in the parathyroid gland, our data demonstrated that HNF1 $\beta$  inhibits human *PTH* gene transcription.

Our hypothesis that HNF1 $\beta$  might be involved in parathyroid gland function was based on our observation that, in patients with HNF1 $\beta$  mutations or whole-gene deletions, PTH levels in several instances were relatively high compared with the degree of renal function decline, if pres-

ent. This was accompanied by reduced urinary Ca<sup>2+</sup> excretion and renal tubular reabsorption of PO<sub>4</sub><sup>3-</sup> that was in the lower range of normal or reduced. Importantly, HNF1 $\beta$  was known to function as a transcription factor regulating gene transcription in a number of specialized endocrine organs and tissues with secondary endocrine functions (19–22). Previously, Adalat et al (18) reported plasma PTH levels in a cohort of patients with chronic kidney disease, in stages 1 through 3, with and without HNF1 $\beta$ -associated disease. They mainly focused on the hypomagnesemia observed in 44% of their patients with HNF1 $\beta$  defects, but they also reported plasma PTH levels were 6.3 pmol/L in patients with HNF1 $\beta$  defects versus 4.9 pmol/L in the patients with renal dysplasia in the absence of such defects (P = .2). Possibly due to the small series of patients, these data did not reach statistical significance. Importantly, Ca<sup>2+</sup> and PO<sub>4</sub><sup>3-</sup> levels were within normal ranges, whereas the GFR was similar in both groups.

The present data clearly show that HNF1 $\beta$  is expressed in a nuclear pattern in the PTH-positive cells of human parathyroid gland. Importantly, we demonstrated that HNF1 $\beta$  binds

to the *PTH* promoter and that the presence of HNF1 $\beta$  inhibits *PTH* transcription, at least in part by a direct effect on the activity of the *PTH* promoter. This inhibitory effect was lost when known mutations in HNF1 $\beta$  were introduced. Taken together, our data indicated that HNF1 $\beta$  acts as a functional repressor of *PTH* gene transcription. Unfortunately, direct evidence that HNF1 $\beta$  decreases the synthesis or secretion of PTH in vitro cannot be provided due to the lack of an available PTH secretory cell line.

So far, many regulatory pathways that control PTH secretion, both transcriptionally and posttranscriptionally, have been defined, and several are currently therapeutic targets for the treatment of secondary hyperparathyroidism in the course of chronic kidney disease (2). These include active vitamin D (1,25-D<sub>3</sub>) analogs and calcimimetics (26–29). The best-known *PTH* transcriptional repressor, 1,25-D<sub>3</sub>, acts by way of the liganded 1,25-D<sub>3</sub> receptor-retinoic acid X receptor (VDR-RXR) complex

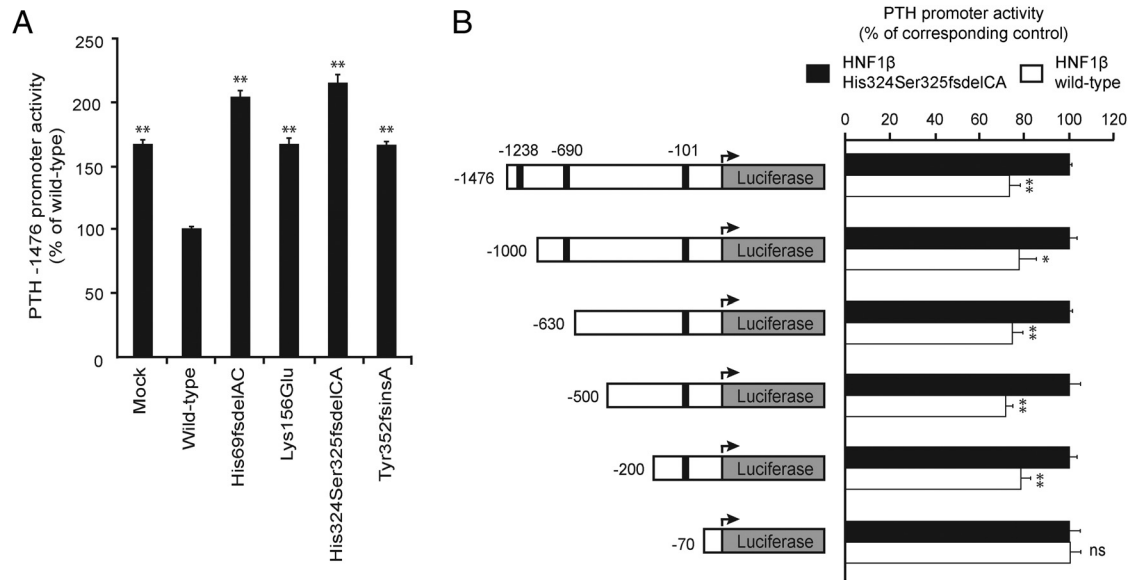

**Figure 3.** HNF1 $\beta$  mutants lack the ability to inhibit *PTH* promoter activity. A, Study of the human *PTH* promoter activity when cotransfected with wild-type HNF1 $\beta$  or HNF1 $\beta$  p.His69fsdelAC, p.Lys156Glu, p.His324Ser325fsdelCA, p.Tyr352fsinsA. mutants or the mock plasmid in HEK293 cells (n = 3). \*\*, P < .001, compared with wild-type HNF1 $\beta$ . B, Serial deletion analysis in which the *PTH* promoter activity was tested in HEK293 cells in the presence of wild-type HNF1 $\beta$  (empty bars) or HNF1 $\beta$  p.His324Ser325fsdelCA mutant (black bars) (n = 9). \*\*, P = .001, compared with HNF1 $\beta$  p.His324Ser325fsdelCA; \*, P = .006, compared with HNF1 $\beta$  p.His324Ser325fsdelCA; ns, nonsignificant compared with HNF1 $\beta$  p.His324Ser325fsdelCA, P = .9.

binding to VDRE in the promoter region of the *PTH* gene. Interestingly, this VDRE was previously mapped to a region very close to the putative HNF1 $\beta$  binding site in the *PTH* promoter (24). There might be cross-talk between pathways involving 1,25-D<sub>3</sub> and HNF1 $\beta$ , but the exact signaling mechanism in which HNF1 $\beta$  is the final effector remains to be determined. Other possibilities include involvement in CaSR-mediated signaling or the recently identified FGF23-FGFR1/klotho axis (30, 31). MAPK pathways presumably play a role downstream of both CaSR and FGFR1/klotho activation in the parathyroid gland, and an interaction between FGF-induced/MAPK-mediated signaling and HNF1 $\beta$  has been previously suggested in other tissues (32–36).

Of note, in our patients with HNF1 $\beta$ -associated disease, a concomitant hypomagnesemia was diagnosed in most individuals. It was previously reported that in the distal part of the nephron, impaired transcriptional regulation of the *FXRD* gene, encoding for the  $\gamma$ -subunit of the Na<sup>+</sup>/K<sup>+</sup>-ATPase, could be responsible for this hypomagnesemic effect (23). Because the Na<sup>+</sup>/K<sup>+</sup>-ATPase pump is essential to generate the driving force for PTH secretion (37), a hypothesis that remains to be tested is whether in the parathyroid glands the impaired transcriptional regulation of *FXRD* family members due to HNF1 $\beta$  abnormalities may contribute to increase PTH expression. *FXRD* proteins are known to associate with the Na<sup>+</sup>/K<sup>+</sup>-ATPase and to modulate its kinetic properties in a tissue-specific manner. However, RT-PCR experiments we performed on human parathyroid samples (Supplemental

Figure 2 and Supplemental Table 1) and a human tissue microarray study failed to detect *FXRD* expression in the parathyroid glands (38). So far, impaired renal *FXRD* expression is the only molecular mechanism connecting the misregulation of the Na<sup>+</sup>/K<sup>+</sup>-ATPase activity to a tissue-specific effect due to HNF1 $\beta$  mutations.

In conclusion, we identified HNF1 $\beta$  as a novel transcriptional regulator of the *PTH* gene and demonstrated that it is expressed in the parathyroid gland. The exact HNF1 $\beta$  binding site within the *PTH* promoter needs to be identified, and the role of HNF1 $\beta$  in the responsiveness of parathyroid cells to extracellular Ca<sup>2+</sup>, 1,25-D<sub>3</sub>, and FGF23 has to be investigated. Loss of the HNF1 $\beta$ -mediated repression of the *PTH* promoter activity in the parathyroid gland could contribute to the high PTH levels observed in our cohort of patients with HNF1 $\beta$ -associated disease. However, it is very difficult to dissect this effect from the secondary hyperparathyroidism that is concomitantly present in some of these patients. Apart from our observations, a single reference to a patient with hyperparathyroidism in a cohort of 27 patients with HNF1 $\beta$ -associated disease (12), and the previously mentioned study by Adalat et al (18) there are to our knowledge no other reports of PTH levels in patients with HNF1 $\beta$ -related disease. To study the clinical significance of HNF1 $\beta$  affecting the synthesis of PTH in patients with HNF1 $\beta$  mutations, future studies will have to evaluate PTH levels in a larger cohort of patients, preferably before the onset of renal function decline. Furthermore, it would be of interest to measure an index of PTH action on the kidney, such as renal cAMP,

as a valuable approach to discriminate the tubular defects associated with the changes in PTH expression from the ones associated with HNF1 $\beta$  mutations.

## Acknowledgments

Address all correspondence and requests for reprints to: Tom Nijenhuis, MD, PhD, Radboud University Nijmegen Medical Centre, Department of Nephrology 464, PO Box 9101, 6500 HB Nijmegen, the Netherlands. E-mail: T.Nijenhuis@nier.umcn.nl.

Financial support was provided by the Netherlands Organization for Scientific Research (ZonMw 9120.8026, NWO ALW 818.02.001), a Vici Grant for J. Hoenderop (NWO-ZonMw 016.130.668), and EURENomics funding from the European Union seventh Framework Programme (FP7/2007–2013, agreement n° 305608).

Disclosure Summary: The authors have nothing to disclose.

## References

- Habener JF, Rosenblatt M, Potts JT Jr. Parathyroid hormone: biochemical aspects of biosynthesis, secretion, action, and metabolism. *Physiol Rev.* 1984;64:985–1053.
- Kumar R, Thompson JR. The regulation of parathyroid hormone secretion and synthesis. *J Am Soc Nephrol.* 2011;22:216–224.
- Hoenderop JG, van der Kemp AW, Urben CM, Strugnell SA, Bindels RJ. Effects of vitamin D compounds on renal and intestinal Ca<sup>2+</sup> transport proteins in 25-hydroxyvitamin D<sub>3</sub>-1 $\alpha$ -hydroxylase knockout mice. *Kidney Int.* 2004;66:1082–1089.
- Kawahara M, Iwasaki Y, Sakaguchi K, et al. Involvement of GCMB in the transcriptional regulation of the human parathyroid hormone gene in a parathyroid-derived cell line PT-r: effects of calcium and 1,25(OH)<sub>2</sub>D<sub>3</sub>. *Bone.* 2010;47:534–541.
- Kawahara M, Iwasaki Y, Sakaguchi K, et al. Predominant role of 25OHD in the negative regulation of PTH expression: clinical relevance for hypovitaminosis D. *Life Sci.* 2008;82:677–683.
- Russell J, Lettieri D, Sherwood LM. Suppression by 1,25(OH)<sub>2</sub>D<sub>3</sub> of transcription of the pre-parathyroid hormone gene. *Endocrinology.* 1986;119:2864–2866.
- Ben-Dov IZ, Galitzer H, Lavi-Moshayoff V, et al. The parathyroid is a target organ for FGF23 in rats. *J Clin Invest.* 2007;117:4003–4008.
- Krajisnik T, Björklund P, Marsell R, et al. Fibroblast growth factor-23 regulates parathyroid hormone and 1 $\alpha$ -hydroxylase expression in cultured bovine parathyroid cells. *J Endocrinol.* 2007;195:125–131.
- Alimov AP, Park-Sarge OK, Sarge KD, Malluche HH, Koszewski NJ. Transactivation of the parathyroid hormone promoter by specificity proteins and the nuclear factor Y complex. *Endocrinology.* 2005;146:3409–3416.
- Koszewski NJ, Alimov AP, Park-Sarge OK, Malluche HH. Suppression of the human parathyroid hormone promoter by vitamin D involves displacement of NF-Y binding to the vitamin D response element. *J Biol Chem.* 2004;279:42431–42437.
- Barbacci E, Reber M, Ott MO, Breillat C, Huetz F, Cereghini S. Variant hepatocyte nuclear factor 1 is required for visceral endoderm specification. *Development.* 1999;126:4795–4805.
- Faguer S, Decramer S, Chassaing N, et al. Diagnosis, management, and prognosis of HNF1B nephropathy in adulthood. *Kidney Int.* 2011;80:768–776.
- Gong Y, Ma Z, Patel V, et al. HNF-1 $\beta$  regulates transcription of the PKD modifier gene Kif12. *J Am Soc Nephrol.* 2009;20:41–47.
- Hiesberger T, Bai Y, Shao X, et al. Mutation of hepatocyte nuclear factor-1 $\beta$  inhibits Pkhd1 gene expression and produces renal cysts in mice. *J Clin Invest.* 2004;113:814–825.
- Gresh L, Fischer E, Reimann A, et al. A transcriptional network in polycystic kidney disease. *EMBO J.* 2004;23:1657–1668.
- Kikuchi R, Kusuhara H, Hattori N, et al. Regulation of tissue-specific expression of the human and mouse urate transporter 1 gene by hepatocyte nuclear factor 1  $\alpha/\beta$  and DNA methylation. *Mol Pharmacol.* 2007;72:1619–1625.
- Kikuchi R, Kusuhara H, Hattori N, et al. Regulation of the expression of human organic anion transporter 3 by hepatocyte nuclear factor 1 $\alpha/\beta$  and DNA methylation. *Mol Pharmacol.* 2006;70:887–896.
- Adalat S, Woolf AS, Johnstone KA, et al. HNF1B mutations associate with hypomagnesemia and renal magnesium wasting. *J Am Soc Nephrol.* 2009;20:1123–1131.
- Reber M, Cereghini S. Variant hepatocyte nuclear factor 1 expression in the mouse genital tract. *Mech Dev.* 2001;100:75–78.
- Bingham C, Bulman MP, Ellard S, et al. Mutations in the hepatocyte nuclear factor-1 $\beta$  gene are associated with familial hypoplastic glomerulocystic kidney disease. *Am J Hum Genet.* 2001;68:219–224.
- Bach I, Mattei MG, Cereghini S, Yaniv M. Two members of an HNF1 homeoprotein family are expressed in human liver. *Nucleic Acids Res.* 1991;19:3553–3559.
- Haumaitre C, Barbacci E, Jenny M, Ott MO, Gradwohl G, Cereghini S. Lack of TCF2/vHNF1 in mice leads to pancreas agenesis. *Proc Natl Acad Sci U S A.* 2005;102:1490–1495.
- Ferre S, Veenstra GJ, Bouwmeester R, Hoenderop JG, Bindels RJ. HNF-1B specifically regulates the transcription of the  $\gamma$ -subunit of the Na<sup>+</sup>/K<sup>+</sup>-ATPase. *Biochem Biophys Res Commun.* 2011;404:284–290.
- Demay MB, Kiernan MS, DeLuca HF, Kronenberg HM. Sequences in the human parathyroid hormone gene that bind the 1,25-dihydroxyvitamin D<sub>3</sub> receptor and mediate transcriptional repression in response to 1,25-dihydroxyvitamin D<sub>3</sub>. *Proc Natl Acad Sci U S A.* 1992;89:8097–8101.
- Senkel S, Lucas B, Klein-Hitpass L, Ryffel GU. Identification of target genes of the transcription factor HNF1 $\beta$  and HNF1 $\alpha$  in a human embryonic kidney cell line. *Biochim Biophys Acta.* 2005;1731:179–190.
- Brown EM. Clinical utility of calcimimetics targeting the extracellular calcium-sensing receptor (CaSR). *Biochem Pharmacol.* 2010;80:297–307.
- Shoben AB, Rudser KD, de Boer IH, Young B, Kestenbaum B. Association of oral calcitriol with improved survival in nondialyzed CKD. *J Am Soc Nephrol.* 2008;19:1613–1619.
- Locatelli F, Cannata-Andía JB, Drüeke TB, et al. Management of disturbances of calcium and phosphate metabolism in chronic renal insufficiency, with emphasis on the control of hyperphosphataemia. *Nephrol Dial Transplant.* 2002;17:723–731.
- Moe SM, Drüeke TB. Management of secondary hyperparathyroidism: the importance and the challenge of controlling parathyroid hormone levels without elevating calcium, phosphorus, and calcium-phosphorus product. *Am J Nephrol.* 2003;23:369–379.
- Urakawa I, Yamazaki Y, Shimada T, et al. Klotho converts canonical FGF receptor into a specific receptor for FGF23. *Nature.* 2006;444:770–774.
- Kuro-o M, Matsumura Y, Aizawa H, et al. Mutation of the mouse klotho gene leads to a syndrome resembling ageing. *Nature.* 1997;390:45–51.
- Lokmane L, Haumaitre C, Garcia-Villalba P, Anselme I, Schneider-Maunoury S, Cereghini S. Crucial role of vHNF1 in vertebrate hepatic specification. *Development.* 2008;135:2777–2786.
- Song J, Kim HJ, Gong Z, Liu NA, Lin S. *Vhnf1* acts downstream of Bmp, Fgf, and RA signals to regulate endocrine  $\beta$ -cell development in zebrafish. *Dev Biol.* 2007;303:561–575.
- Wiellette EL, Sive H. *vhnf1* and Fgf signals synergize to specify rhombomere identity in the zebrafish hindbrain. *Development.* 2003;130:3821–3829.
- Hernandez RE, Rikhof HA, Bachmann R, Moens CB. *vhnf1* integrates global RA patterning and local FGF signals to direct posterior hindbrain development in zebrafish. *Development.* 2004;131:4511–4520.
- Xu X, Browning VL, Odorico JS. Activin, BMP and FGF pathways cooperate to promote endoderm and pancreatic lineage cell differentiation from human embryonic stem cells. *Mech Dev.* 2011;128:412–427.
- Imura A, Tsuji Y, Murata M, et al.  $\alpha$ -Klotho as a regulator of calcium homeostasis. *Science.* 2007;316:1615–1618.
- Floyd RV, Wray S, Martín-Vasallo P, Mobasher A. Differential cellular expression of FXD1 (phospholemman) and FXD2 (gamma subunit of Na, K-ATPase) in normal human tissues: a study using high density human tissue microarrays. *Ann Anat.* 2010;192:7–16.
